# Supplementary material for: Genome-Wide Chromatin Remodeling Identified at GC-Rich Long Nucleosome-Free Regions
Source: PLOS journal article supplement (doi:10.1371/journal.pone.0047924), 2012-11-05

**A**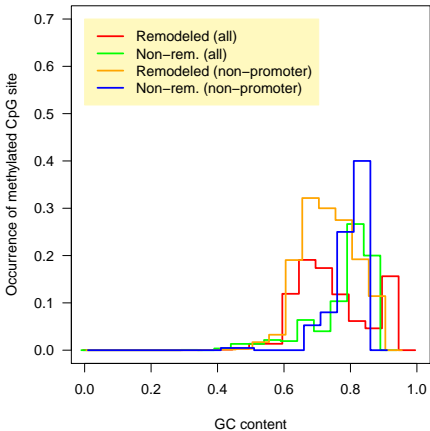**B**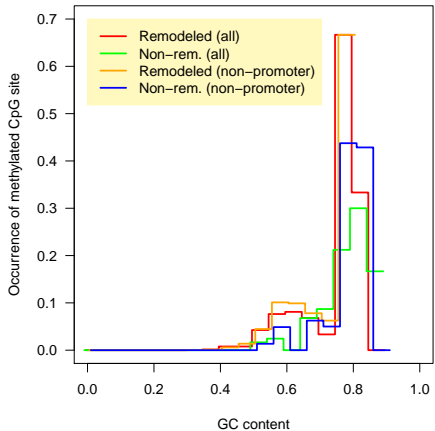

Supplement: S11 (10.1371/journal.pone.0047924.s011) [file journal.pone.0047924.s011]
