# Supplementary material for: Genome-Wide Chromatin Remodeling Identified at GC-Rich Long Nucleosome-Free Regions
Source: PLOS journal article supplement (doi:10.1371/journal.pone.0047924), 2012-11-05
Supplement: S16 (10.1371/journal.pone.0047924.s016) [file journal.pone.0047924.s016]

|                       | <b>number of<br/>all LNFRs</b> | <b>observed<br/>overlapping<br/>LNFRs</b> | <b>expected<br/>overlapping<br/>LNFRs</b> | <b><i>p</i>-value</b> |
|-----------------------|--------------------------------|-------------------------------------------|-------------------------------------------|-----------------------|
| Resting               | 79,092                         | 5,018                                     | 2,179                                     | $<5 \times 10^{-324}$ |
| Activated             | 47,270                         | 2,002                                     | 1,300                                     | $2.9 \times 10^{-75}$ |
| Resting and activated | 4,761                          | 159                                       | 132                                       | 0.01                  |
