# Supplementary material for: Genome-Wide Chromatin Remodeling Identified at GC-Rich Long Nucleosome-Free Regions
Source: PLOS journal article supplement (doi:10.1371/journal.pone.0047924), 2012-11-05
Supplement: S17 (10.1371/journal.pone.0047924.s017) [file journal.pone.0047924.s017]

|                       | <b>number of<br/>all LNFRs</b> | <b>observed<br/>overlapping<br/>LNFRs</b> | <b>expected<br/>overlapping<br/>LNFRs</b> | <b><i>p</i>-value</b> |
|-----------------------|--------------------------------|-------------------------------------------|-------------------------------------------|-----------------------|
| Resting               | 79,092                         | 1,805                                     | 409                                       | $<5 \times 10^{-324}$ |
| Activated             | 47,270                         | 577                                       | 241                                       | $1.4 \times 10^{-75}$ |
| Resting and activated | 4,761                          | 37                                        | 25                                        | 0.015                 |
