# Supplementary material for: Genome-Wide Chromatin Remodeling Identified at GC-Rich Long Nucleosome-Free Regions
Source: PLOS journal article supplement (doi:10.1371/journal.pone.0047924), 2012-11-05
Supplement: S18 (10.1371/journal.pone.0047924.s018) [file journal.pone.0047924.s018]

| Hypothesis/test                                                | diff. of mean<br>expression | <i>t</i> -score       | regularized<br><i>t</i> -score |
|----------------------------------------------------------------|-----------------------------|-----------------------|--------------------------------|
| remodeled < non-remodeled<br>(Wilcoxon-Mann-Withney test)      | $1.7 \times 10^{-17}$       | $2.0 \times 10^{-16}$ | $3.5 \times 10^{-17}$          |
| remodeled (GC) < non-remodeled<br>(Wilcoxon-Mann-Withney test) | $5.9 \times 10^{-20}$       | $2.5 \times 10^{-18}$ | $1.5 \times 10^{-20}$          |
| remodeled enriched in downreg.<br>(Fisher's exact test)        | $4.9 \times 10^{-14}$       | $8.3 \times 10^{-8}$  | $8.5 \times 10^{-13}$          |
| remodeled (GC) enriched in downreg.<br>(Fisher's exact test)   | $5.1 \times 10^{-13}$       | $2.4 \times 10^{-7}$  | $3.7 \times 10^{-13}$          |
